# Supplementary material
Source: publisher site journal article supplement (https://www.dovepress.com/article/483993)
Supplement: Supplementary file 1 [file get_supplementary_file.php]

***APPENDIX 1***


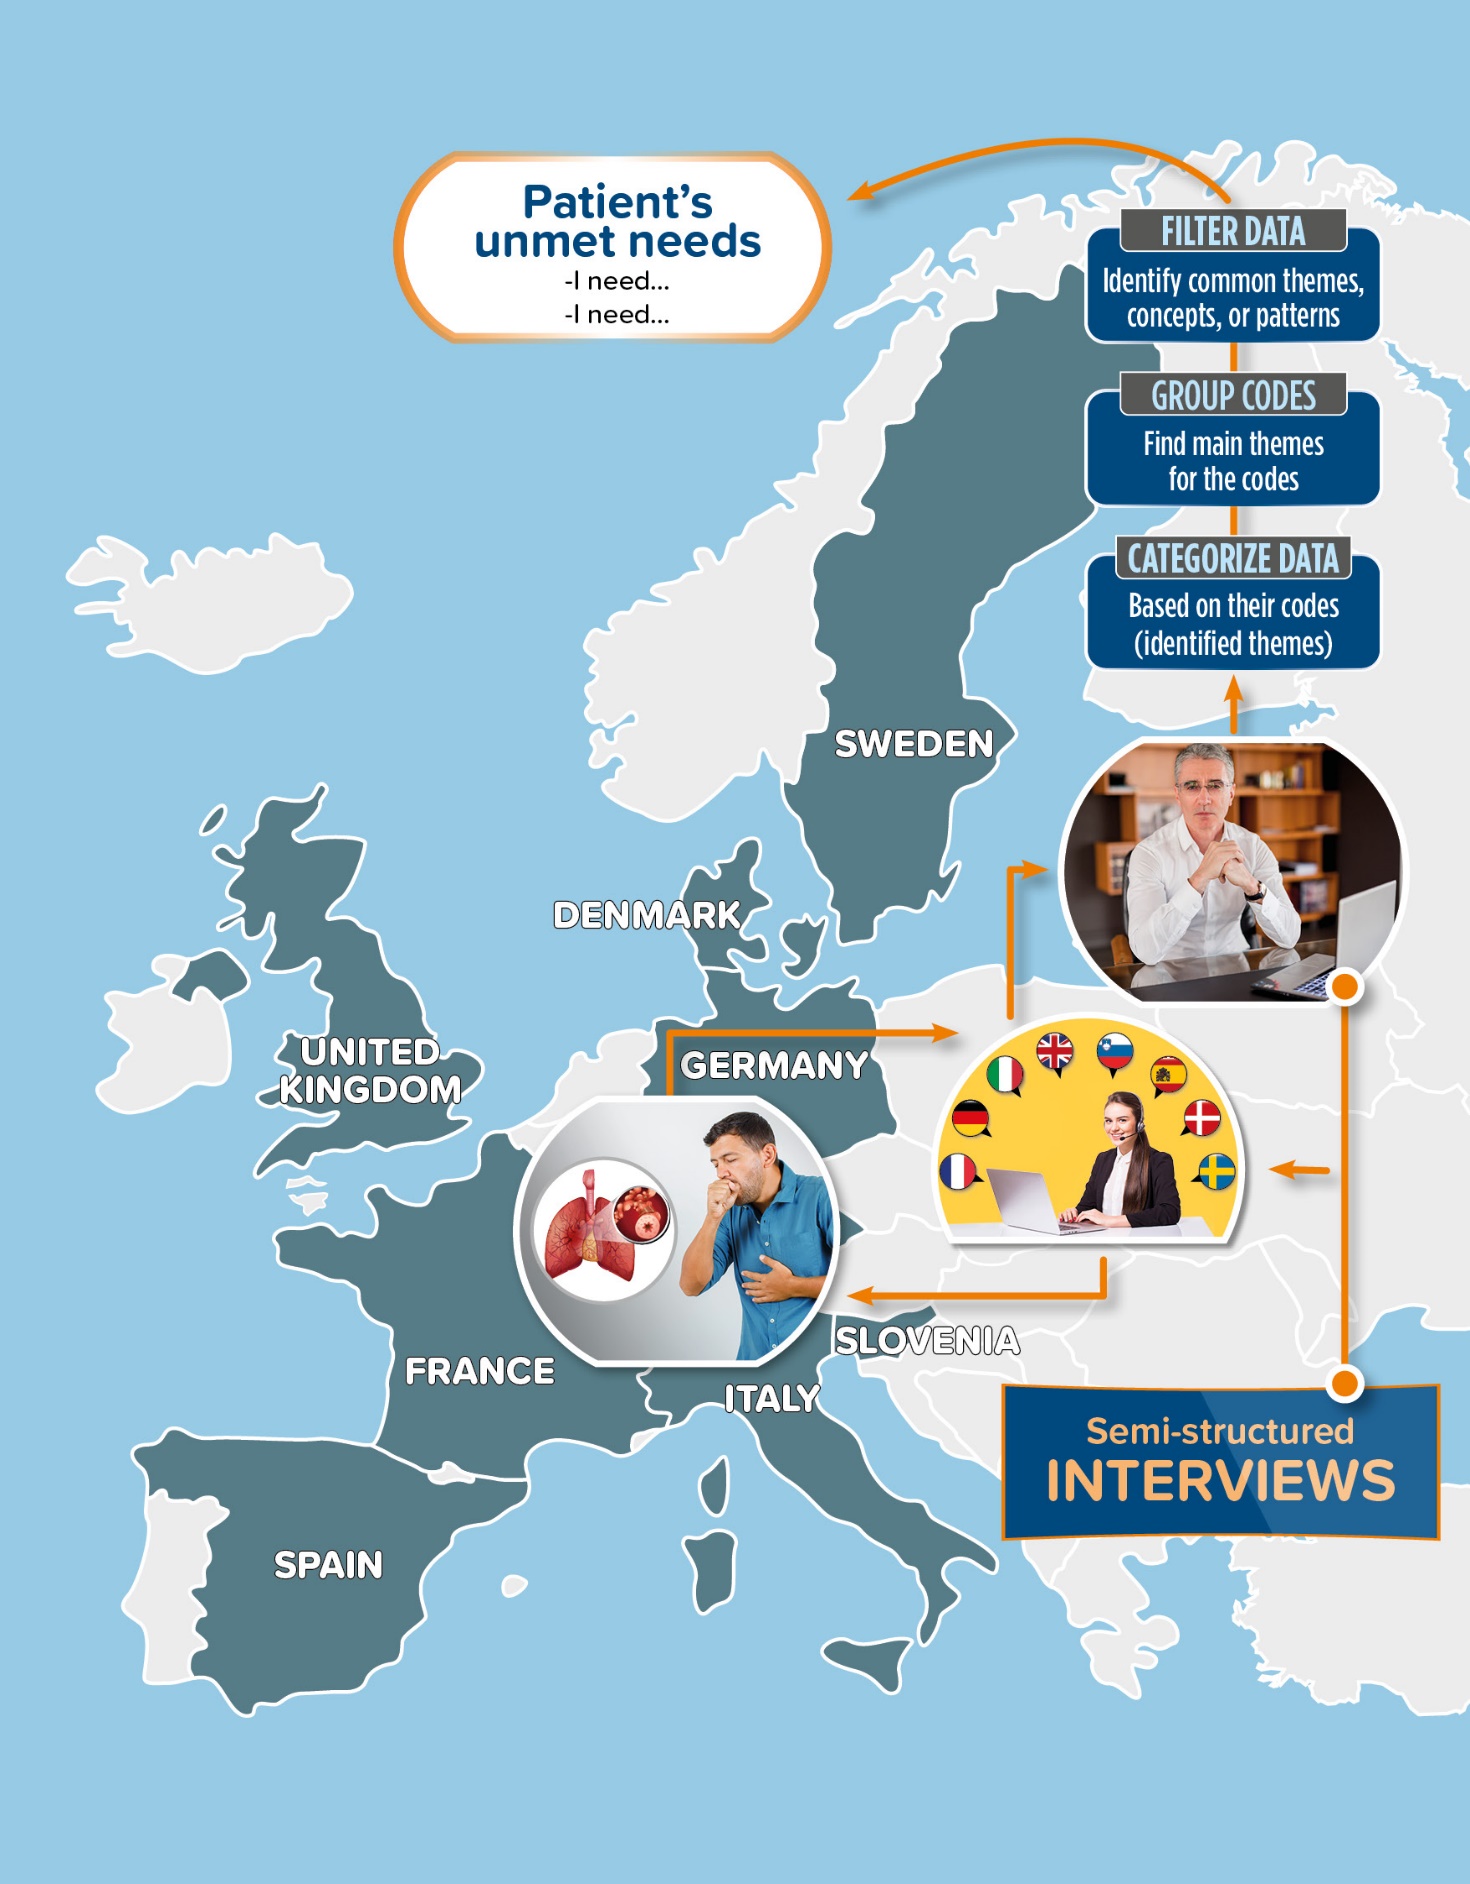


*Figure 1A - Summary of the study methods. Countries involved in the study are indicated in grey*

*Figure 2A - NEXThaler - Participants’ interpretation of the click*

*Figure 3A - NEXThaler - Average rating of the impact of the ‘click of confidence’ on a patient’s life*

*Figure 4A - NEXThaler - Average rating of the impact of the ‘click of confidence’ on a patient’s treatment experience*

*Figure 5A - NEXThaler - Average rating of the impact of the ‘click of confidence’ on a patient’s confidence*

*Figure 6A - NEXThaler - Average rating of the impact of the inhalation effort on a patient’s life*

*Figure 7A - NEXThaler - Average rating of the impact of the inhalation effort on a patient’s treatment experience*

*Figure 8A - NEXThaler - Average rating of the impact of the inhalation effort on a patient’s confidence*

*Figure 9A - NEXThaler - Average rating of the impact of the inhalation counter on a patient’s life*

*Figure 10A - NEXThaler - Average rating of the impact of the inhalation counter on a patient’s treatment experience*

*Figure 11A - NEXThaler - Average rating of the impact of the inhalation counter on a patient’s confidence*
